# Supplementary material
Source: Research Square preprint supplement (doi:10.21203/rs.3.rs-9776416/v1)
Supplement: Supplementary file 1 [file 46a98610fee307add3577c80.pdf]

# Supplementary Figure S1. STROBE participant flow

CHARLS Wave 1 (2011/12) baseline → Wave 3 (2015) incident Fried-phenotype frailty

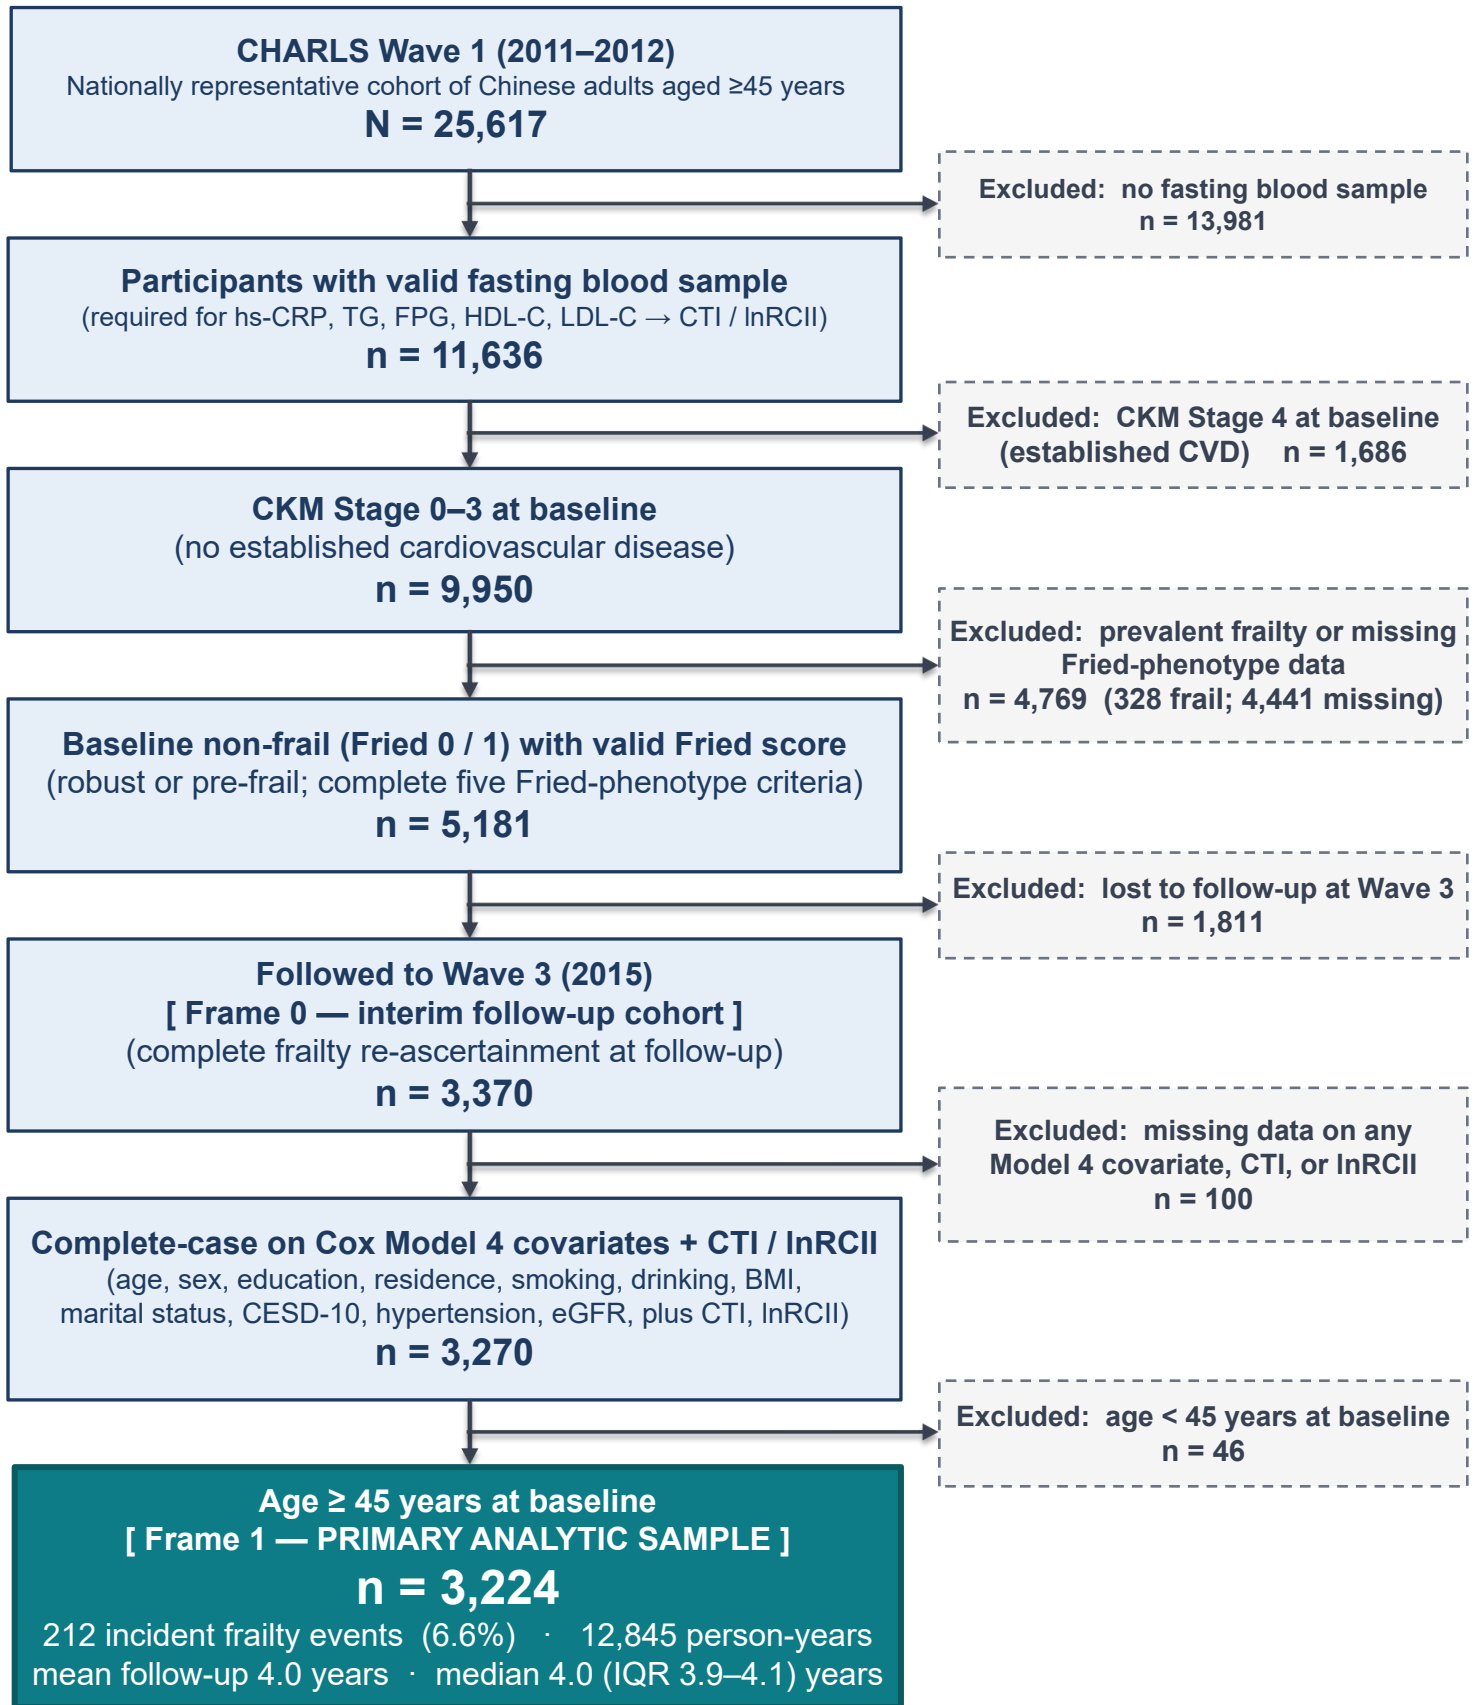

**Abbreviations:** CHARLS, China Health and Retirement Longitudinal Study; CKM, Cardiovascular–Kidney–Metabolic syndrome (AHA 2023); CVD, cardiovascular disease; CTI, C-reactive protein–triglyceride–glucose index; InRCII, natural-log residual cholesterol inflammatory index; hs-CRP, high-sensitivity C-reactive protein; TG, triglycerides; FPG, fasting plasma glucose; HDL-C / LDL-C, high- / low-density-lipoprotein cholesterol; BMI, body-mass index; eGFR, estimated glomerular filtration rate (CKD-EPI equation); CESD-10, 10-item Center for Epidemiologic Studies Depression scale; Fried 0 / 1, robust / pre-frail by the Fried phenotype; Model 4, primary fully-adjusted Cox model; STROBE, Strengthening the Reporting of Observational Studies in Epidemiology.

Reporting follows the STROBE statement for observational cohort studies; the populated STROBE checklist is provided as Supplementary File 1.
