# Supplementary material
Source: Research Square preprint supplement (doi:10.21203/rs.3.rs-9776416/v1)
Supplement: Supplementary file 2 [file 7d22509646b9bce3d19cc473.docx]

STROBE Statement—Checklist of items that should be included in reports of ***cohort studies***

|  | Item No | Recommendation | Page No |
| --- | --- | --- | --- |
| **Title and abstract** | 1 | (*a*) Indicate the study’s design with a commonly used term in the title or the abstract | p. 1 (Title — “prospective CHARLS cohort study”); p. 1–2 (Abstract) |
| (*b*) Provide in the abstract an informative and balanced summary of what was done and what was found | pp. 1–2 (structured Abstract: Background / Methods / Results / Conclusions) |
| Introduction | | | |
| Background/rationale | 2 | Explain the scientific background and rationale for the investigation being reported | p. 2 (Background, paragraphs 1–3) |
| Objectives | 3 | State specific objectives, including any prespecified hypotheses | p. 2 (Background, final paragraph — 5 enumerated objectives and a-priori hypotheses) |
| Methods | | | |
| Study design | 4 | Present key elements of study design early in the paper | p. 3 (Methods, Study design and population — prospective cohort, CHARLS Wave 1 → Wave 3) |
| Setting | 5 | Describe the setting, locations, and relevant dates, including periods of recruitment, exposure, follow-up, and data collection | p. 3 (Methods, Study design and population — nationally representative CHARLS cohort across 28 provinces / 150 counties; recruitment and baseline biomarker measurement at Wave 1 [2011–2012]; primary outcome ascertainment at Wave 3 [2015]; extended-follow-up data collection at Wave 4 [2018] and Wave 5 [2020]) |
| Participants | 6 | (*a*) Give the eligibility criteria, and the sources and methods of selection of participants. Describe methods of follow-up | p. 3 (Methods, Study design and population, paragraph 2 — sequential exclusions from N = 25,617 to N = 3,224 with 212 events; Supplementary Figure S1 STROBE flow); follow-up by in-person Wave 3 [2015] CHARLS re-interview with standardised re-assessment of all Fried-phenotype components |
| (*b*)For matched studies, give matching criteria and number of exposed and unexposed | Not applicable — unmatched prospective cohort |
| Variables | 7 | Clearly define all outcomes, exposures, predictors, potential confounders, and effect modifiers. Give diagnostic criteria, if applicable | p. 3 (Methods, Exposure assessment; Outcome assessment; Covariates and model structure) |
| Data sources/ measurement | 8* | For each variable of interest, give sources of data and details of methods of assessment (measurement). Describe comparability of assessment methods if there is more than one group | p. 3 (Methods, Exposure assessment — fasting blood, Youanmen Center for Clinical Laboratory; Outcome assessment — Fried physical phenotype, 5 components) |
| Bias | 9 | Describe any efforts to address potential sources of bias | p. 4 (Methods, Statistical analysis — progressive Models 1–5, Schoenfeld diagnostics, sensitivity framework); p. 8 (Strengths and limitations) |
| Study size | 10 | Explain how the study size was arrived at | p. 3 (Methods, Study design and population — sequential exclusion arithmetic from N = 25,617 to N = 3,224 with 212 events) |
| Quantitative variables | 11 | Explain how quantitative variables were handled in the analyses. If applicable, describe which groupings were chosen and why | p. 3 (Methods, Exposure assessment — ln transformation, per-1-SD, quartile parameterisation); p. 4 (Methods, Statistical analysis — restricted cubic splines, 4 knots at 5/35/65/95 percentiles) |
| Statistical methods | 12 | (*a*) Describe all statistical methods, including those used to control for confounding | p. 4 (Methods, Statistical analysis — Cox proportional hazards, Efron tie correction, progressive Models 1–5 covariate adjustment) |
| (*b*) Describe any methods used to examine subgroups and interactions | p. 4 (Methods, Statistical analysis — 8 pre-specified subgroups; Knol–VanderWeele cross-classification with RERI/AP/S, 2,000 bootstrap iterations) |
| (*c*) Explain how missing data were addressed | p. 3 (Methods, Study design and population — unified complete-case rule); p. 4 (Methods, Statistical analysis — MICE m = 20, Rubin’s rules; survey-weighted Cox) |
| (*d*) If applicable, explain how loss to follow-up was addressed | p. 3 (Methods, Study design and population — loss to follow-up at Wave 3 [n = 1,811] reported and shown in STROBE flow Supplementary Figure S1) |
| (*e*) Describe any sensitivity analyses | p. 4 (Methods, Statistical analysis — pre-specified sensitivity framework: Fine–Gray competing-risk, MI, survey-weighted Cox, E-values, NRI/IDI, hs-CRP head-to-head, DCA, ML triangulation, fasting robustness, FI≥0.25 alternative outcome, extended follow-up Waves 4/5, longitudinal exposures, 12 population-restriction scenarios; Supplementary Tables S1, S4–S16) |
| Results | | |  |
| Participants | 13* | (a) Report numbers of individuals at each stage of study—eg numbers potentially eligible, examined for eligibility, confirmed eligible, included in the study, completing follow-up, and analysed | p. 3 (Methods, Study design and population); Supplementary Figure S1 (STROBE flow); p. 5 (Results — N = 3,224 with 212 events / 3,012 censored) |
| (b) Give reasons for non-participation at each stage | p. 3 (Methods, Study design and population — reasons at each step: no fasting blood [n = 13,981], CKM Stage 4 [n = 1,686], prevalent frailty or missing Fried data [n = 4,769], loss to follow-up [n = 1,811], missing covariate or index [n = 100], age < 45 [n = 46]) |
| (c) Consider use of a flow diagram | Supplementary Figure S1 (STROBE participant-flow diagram) |
| Descriptive data | 14* | (a) Give characteristics of study participants (eg demographic, clinical, social) and information on exposures and potential confounders | p. 5 (Results, Baseline characteristics); Table 1 (baseline characteristics stratified by lnRCII quartile [primary exposure]); Supplementary Table S1 (parallel baseline characteristics stratified by CTI quartile [comparator]) |
| (b) Indicate number of participants with missing data for each variable of interest | p. 3 (Methods, Study design and population — n = 100 excluded under unified complete-case rule); Supplementary Table S4 (included vs. excluded comparison) |
| (c) Summarise follow-up time (eg, average and total amount) | p. 5 (Results, Baseline characteristics — mean follow-up 4.0 years; 12,845 person-years total) |
| Outcome data | 15* | Report numbers of outcome events or summary measures over time | p. 5 (Results — 212 incident frailty events / 3,224 [6.6%] over 12,845 person-years) |

| Main results | 16 | (*a*) Give unadjusted estimates and, if applicable, confounder-adjusted estimates and their precision (eg, 95% confidence interval). Make clear which confounders were adjusted for and why they were included | p. 5 (Results, lnRCII and new-onset frailty; CTI comparator and joint Cox sensitivity model); Table 2 (Cox HRs across Models 1–5 per quartile and per 1-SD); primary fully adjusted Model 4: lnRCII per-1-SD HR = 1.26, 95% CI 1.09–1.45, P = 0.001; Q4 vs. Q1 HR = 1.96, 95% CI 1.30–2.94 (CTI comparator HR = 1.23, 95% CI 1.06–1.43); Model 4 adjusted for age, sex, education, residence, smoking, drinking, BMI, marital status, depressive symptoms (CESD-10 ≥10), hypertension and eGFR (CKD-EPI); these confounders were pre-specified as established risk factors for frailty and cardiometabolic burden (p. 3, Methods, Covariates and model structure); Supplementary Table S3 (progressive Models 1–5) |
| --- | --- | --- | --- |
| (*b*) Report category boundaries when continuous variables were categorized | p. 5 (Results — lnRCII and CTI analysed per 1-SD and by quartile, Q1 reference); Table 1 (lnRCII quartile cut-offs); Supplementary Table S1 (CTI quartile cut-offs) |
| (*c*) If relevant, consider translating estimates of relative risk into absolute risk for a meaningful time period | p. 6 (Nomogram, calibration and DCA — absolute-risk DCA net benefit 0.030 at 5% threshold, equivalent to ~30 net true-positive cases per 1,000 screened); Figure 5 |
| Other analyses | 17 | Report other analyses done—eg analyses of subgroups and interactions, and sensitivity analyses | p. 6 (Subgroup analyses — Figure 2 forest plots, 8 strata, all P-interaction > 0.05); pp. 5–6 (Joint effects — Knol–VanderWeele, Table 3); p. 6 (Sensitivity analyses; Supplementary Tables S1, S4–S16) |
| Discussion | | | |
| Key results | 18 | Summarise key results with reference to study objectives | p. 7 (Discussion, opening — lnRCII per-1-SD HR = 1.26 [95% CI 1.09–1.45]; first prospective Chinese-cohort evidence on composite RCII vs. Fried phenotype; nomogram optimism-corrected C-index 0.756; positive DCA net benefit at 5–10% thresholds) |
| Limitations | 19 | Discuss limitations of the study, taking into account sources of potential bias or imprecision. Discuss both direction and magnitude of any potential bias | p. 8 (Strengths and limitations — 8 numbered limitations: lnRCII–CTI collinearity [r = 0.84], E-value 1.83–3.33 residual confounding, 4-year window/event-rate power, Fried self-report misclassification, ML interpretive limits under collinearity, non-Chinese generalisability, moderate discrimination [C-index 0.756], extended-follow-up joint-model lnRCII attenuation versus CTI concentration [W4 lnRCII joint HR = 1.01, P = 0.85; W5 lnRCII joint HR = 0.96, P = 0.38; W4 CTI joint HR = 1.12, P = 0.016; W5 CTI joint HR = 1.16, P = 0.002]) |
| Interpretation | 20 | Give a cautious overall interpretation of results considering objectives, limitations, multiplicity of analyses, results from similar studies, and other relevant evidence | p. 7 (Discussion, opening and Comparison with previous studies); pp. 7–8 (Mechanistic interpretation); p. 8 (Clinical implications and Strengths and limitations) |
| Generalisability | 21 | Discuss the generalisability (external validity) of the study results | p. 8 (Discussion, Clinical implications and Strengths and limitations item 6 — external validation required in non-Chinese cohorts [ELSA, HRS] and non-CHARLS Chinese cohorts [China Kadoorie Biobank]); p. 8 (Conclusions) |
| Other information | | | |
| Funding | 22 | Give the source of funding and the role of the funders for the present study and, if applicable, for the original study on which the present article is based | Present study (p. 10, Declarations, Funding): National Natural Science Foundation of China Grant No. 82411540241; Science and Technology Project of Xiamen Medical College Grant No. K2023-09; 2024 Fujian Province Science and Technology Program Project No. 2024048 — all to G.Y.; the funders had no role in study design, data collection, analysis, interpretation or manuscript preparation. Original (parent) CHARLS study: conducted by the National School of Development, Peking University, with public funding sources detailed at https://charls.pku.edu.cn/en/; this secondary analysis used publicly available de-identified CHARLS data and received no direct funding from the parent CHARLS study. |

*Give information separately for exposed and unexposed groups.

**Note:** An Explanation and Elaboration article discusses each checklist item and gives methodological background and published examples of transparent reporting. The STROBE checklist is best used in conjunction with this article (freely available on the Web sites of PLoS Medicine at http://www.plosmedicine.org/, Annals of Internal Medicine at http://www.annals.org/, and Epidemiology at http://www.epidem.com/). Information on the STROBE Initiative is available at http://www.strobe-statement.org.
