# Supplementary material
Source: Research Square preprint supplement (doi:10.21203/rs.3.rs-9776416/v1)
Supplement: Supplementary file 3 [file 7f0aaa0315c99db9266a5185.docx]

**Supplementary File 2. TRIPOD+AI 2024 Checklist for Manuscript Reporting**

*Lipids in Health and Disease submission — “Residual cholesterol inflammatory index and new-onset Fried-phenotype frailty in middle-aged and older Chinese adults: a prospective CHARLS cohort study.”*

**Reference:** Collins GS, Moons KGM, Dhiman P, Riley RD, Beam AL, Van Calster B, et al. TRIPOD+AI statement: updated guidance for reporting clinical prediction models that use regression or machine learning methods. *BMJ* 2024;385:e078378. doi:10.1136/bmj-2023-078378 [Manuscript Ref. 52].

**Reporting scope:** Development (D) only. This study develops a Cox-based prediction model with lnRCII as the primary exposure and CTI as a pre-specified positive comparator, within a prospective CHARLS cohort, augmented by XGBoost+TreeSHAP machine-learning triangulation. The internally validated Cox-based nomogram is anchored on lnRCII (Model 4 covariates plus lnRCII); the corresponding CTI nomogram is reported in Supplementary Figure S2 for transparent benchmarking. No external validation in a separate cohort is presented; pre-specified extended-follow-up sensitivity analyses through Waves 4 and 5 are internal robustness checks (see Items 12c, 12f, 16, 18d, 20c). For items labelled “D;E” in the official checklist, only the development (D) facet is addressed below. Items labelled “E” only in the official checklist (Items 12f, 12g, 20c, 24) are marked Not applicable with an explicit explanation.

| **Section / Topic** | **Item** | **Checklist item** | **Reported on page No.** |
| --- | --- | --- | --- |
| **TITLE** | | | |
| **Title** | **1** *D;E* | Identify the study as developing or evaluating the performance of a multivariable prediction model, the target population, and the outcome to be predicted. | p. 1 (Title — *“Residual cholesterol inflammatory index and new-onset Fried-phenotype frailty in middle-aged and older Chinese adults: a prospective CHARLS cohort study”*); p. 1–2 (Abstract Methods/Conclusions). The study develops a Cox-based prediction model with lnRCII as the primary exposure and CTI as a pre-specified positive comparator (D); no separate external evaluation cohort is presented. |
| **ABSTRACT** | | | |
| **Abstract** | **2** *D;E* | See TRIPOD+AI for Abstracts checklist. | pp. 1–2 (structured Abstract: Background / Methods / Results / Conclusions). Key findings include lnRCII per-1-SD HR = 1.26, 95% CI 1.09–1.45, P = 0.001; top-quartile HR = 1.96, 95% CI 1.30–2.94; CTI per-1-SD comparator HR = 1.23, 95% CI 1.06–1.43; 1,000-bootstrap optimism-corrected C-index = 0.756 for the lnRCII nomogram; positive decision-curve net benefit at 5–10% threshold probabilities; XGBoost test AUC = 0.754. |
| **INTRODUCTION** | | | |
| **Background** | **3a** *D;E* | Explain the healthcare context (including whether diagnostic or prognostic) and rationale for developing or evaluating the prediction model, including references to existing models. | p. 2 (Background, paragraphs 1–3 — prognostic context within the AHA 2023 Cardiovascular–Kidney–Metabolic [CKM] syndrome framework [Ref. 7], with frailty positioned as a central node in the cardiometabolic–ageing continuum [Refs. 8, 9, 45]); p. 2 (Background, paragraph 3 — rationale for the composite RCII over single biomarkers [Ref. 10] and explicit gap analysis against prior RCII–disease literature [Refs. 13–17, 26, 50, 54, 55, 56], the CTI–frailty CHARLS analysis [Ref. 18] and the cross-sectional residual-cholesterol–Fried-phenotype NHANES analysis [Ref. 54]). |
|  | **3b** *D;E* | Describe the target population and the intended purpose of the prediction model in the context of the care pathway, including its intended users (e.g., healthcare professionals, patients, public). | p. 2 (Background, final paragraph — prospective evaluation in baseline non-frail community-dwelling Chinese adults aged ≥45 years); p. 8 (Discussion, Clinical implications — intended users are primary-care physicians within China’s annual cardiometabolic surveillance for adults aged ≥45 years; intended purpose is opportunistic frailty risk stratification within the AHA 2023 CKM framework, complementing the WHO Integrated Care for Older People [ICOPE] screen). |
|  | **3c** *D;E* | Describe any known health inequalities between sociodemographic groups. | p. 5 (Results, Baseline characteristics — 51.6% female, 68.8% rural residence, 53.5% low education); Table 1 (baseline characteristics stratified by lnRCII quartile [primary exposure] showing Q1–Q4 sociodemographic gradients, including rural residence, sex distribution, and educational attainment); Supplementary Table S1 (parallel stratification by CTI quartile [comparator]); p. 6 (Results, Subgroup analyses — pre-specified strata include education and other sociodemographic dimensions); p. 8 (Discussion, Clinical implications and Strengths and limitations item 6 — explicit acknowledgement that external validation in non-Chinese populations is required to evaluate generalisability across ethnic and healthcare-system strata). |
| **Objectives** | **4** *D;E* | Specify the study objectives, including whether the study describes the development or validation of a prediction model (or both). | p. 2 (Background, final paragraph — five enumerated objectives: [1] dose–response shape; [2] effect modification across demographic and metabolic subgroups; [3] joint and additive-interaction behaviour of the two correlated indices; [4] discriminative and clinical utility of a Cox-based nomogram via internal-bootstrap validation and decision-curve analysis; [5] variable-importance ranking using XGBoost with TreeSHAP); p. 2 (a-priori hypotheses — lnRCII would independently and dose-dependently predict incident frailty paralleling CTI, with joint behaviour reflecting a shared inflammatory–cardiometabolic substrate). The study describes prediction-model development only. |
| **METHODS** | | | |
| **Data** | **5a** *D;E* | Describe the sources of data separately for the development and evaluation datasets (e.g., randomised trial, cohort, routine care or registry data), the rationale for using these data, and representativeness of the data. | p. 3 (Methods, Study design and population — CHARLS Wave 1 [2011–2012] baseline → Wave 3 [2015] follow-up; nationally representative prospective cohort employing multistage stratified probability-proportional-to-size sampling across 28 provinces and 150 counties [Ref. 34]). Rationale: CHARLS is the only nationally representative Chinese ageing cohort with serial Fried-phenotype assessments and a complete fasting biomarker panel allowing derivation of both RCII and CTI; representativeness supports prospective inference for community-dwelling Chinese adults aged ≥45 years. |
|  | **5b** *D;E* | Specify the dates of the collected participant data, including start and end of participant accrual; and, if applicable, end of follow-up. | p. 3 (Methods, Study design and population — accrual: Wave 1, 2011–2012 [Ref. 34]; primary follow-up to Wave 3, 2015; extended-follow-up sensitivity through Wave 4 [2018] and Wave 5 [2020]); p. 5 (Results, Baseline characteristics — mean follow-up 4.0 years; 12,845 person-years for the primary cohort). |
| **Participants** | **6a** *D;E* | Specify key elements of the study setting (e.g., primary care, secondary care, general population) including the number and location of centres. | p. 3 (Methods, Study design and population — general-population cohort of community-dwelling Chinese adults aged ≥45 years; multistage stratified probability-proportional-to-size sampling across 28 provinces and 150 counties [Ref. 34]). |
|  | **6b** *D;E* | Describe the eligibility criteria for study participants. | p. 3 (Methods, Study design and population, paragraph 2 — sequential exclusions from N = 25,617 Wave 1 participants: no fasting blood sample [n = 13,981]; CKM Stage 4 at baseline [established CVD; n = 1,686]; prevalent frailty or missing Fried-phenotype data [n = 4,769]; loss to follow-up at Wave 3 [n = 1,811]; 100 with missing data on any model covariate or index; 46 aged < 45 years). Final eligibility: age ≥45 years, baseline non-frail (robust or pre-frail), CKM Stages 0–3, complete CTI and lnRCII. Primary analytical sample: N = 3,224 with 212 incident frailty events. Supplementary Figure S1 provides the STROBE participant-flow diagram. |
|  | **6c** *D;E* | Give details of any treatments received, and how they were handled during model development or evaluation, if relevant. | Not applicable in the strict interventional sense — observational cohort with no protocol-defined intervention. Baseline lifestyle factors (smoking, drinking, BMI) and chronic conditions (hypertension, depressive symptoms) measured at Wave 1 were entered as adjustment covariates in progressive Models 3–5; see p. 3 (Methods, Covariates and model structure) and Item 9b. Granular data on lipid-lowering or anti-inflammatory therapies were not collected in CHARLS 2011 and this is acknowledged as a limitation (p. 8, Strengths and limitations item 4). |
| **Data preparation** | **7** *D;E* | Describe any data pre-processing and quality checking, including whether this was similar across relevant sociodemographic groups. | p. 3 (Methods, Exposure assessment — natural-log transformation of RCII to address marked right skew [skewness 8.2 → 0.3]; per-1-SD and quartile parameterisations for both lnRCII and CTI; fasting venous blood drawn at baseline under standardised CHARLS protocols and assayed at the Youanmen Center for Clinical Laboratory, Capital Medical University, Beijing, with standardised enzymatic / direct enzymatic / hexokinase / latex-enhanced immunonephelometry assays); p. 3 (Methods, Study design and population — a unified complete-case rule was applied across all primary Cox models [n = 100 excluded for missing data on any model covariate or index], implemented uniformly across sociodemographic strata); p. 4 (Methods, Statistical analysis — multiple imputation by chained equations [MICE, m = 20, Rubin’s rules] and survey-weighted Cox regression as pre-specified sensitivity scenarios). |
| **Outcome** | **8a** *D;E* | Clearly define the outcome that is being predicted and the time horizon, including how and when assessed, the rationale for choosing this outcome, and whether the method of outcome assessment is consistent across sociodemographic groups. | p. 3 (Methods, Outcome assessment — Fried physical phenotype [Ref. 1] operationalised using the five CHARLS criteria: (i) unintentional weight loss [>5 kg or >5% over 1–2 years]; (ii) exhaustion [CESD-10 items]; (iii) low physical activity [lowest sex-specific quintile of weekly MET-hours]; (iv) slow gait speed [2.5-m walk test with sex- and height-specific cut-offs]; (v) weak grip strength [sex- and BMI-specific thresholds]; participants meeting ≥3 criteria classified as frail). Primary time horizon: 4-year prediction window (Wave 1 → Wave 3). Rationale: the Fried physical phenotype emphasises grip strength and gait speed [shared with the EWGSOP-2 sarcopenia construct, Ref. 35], a functional dimension distinct from and complementary to the deficit-accumulation Frailty Index used in prior CHARLS RCII work [Ref. 26]. Outcome operationalisation uses standardised CHARLS instruments applied uniformly across all sociodemographic strata; p. 5 (Results) — 212 events / 3,224 participants (6.6%). |
|  | **8b** *D;E* | If outcome assessment requires subjective interpretation, describe the qualifications and demographic characteristics of the outcome assessors. | Not applicable — Fried-phenotype components in CHARLS are operationalised through structured questionnaire items (CESD-10 exhaustion subscale) and standardised physical measurements (handgrip dynamometry with sex- and BMI-specific thresholds; 2.5-m timed gait test with sex- and height-specific cut-offs; weekly MET-hour physical activity by lowest sex-specific quintile) administered by trained CHARLS field interviewers under unified protocols, not by subjective rater interpretation; see p. 3 (Methods, Outcome assessment). |
|  | **8c** *D;E* | Report any actions to blind assessment of the outcome to be predicted. | Inherent in CHARLS field-survey design — Wave 3 outcome ascertainment by CHARLS field interviewers was conducted prospectively and independently of any exposure-derived analytic variables (lnRCII, CTI) constructed retrospectively for this secondary analysis; see p. 3 (Methods, Outcome assessment) and p. 3 (Methods, Exposure assessment). |
| **Predictors** | **9a** *D* | Describe the choice of initial predictors (e.g., literature, previous models, all available predictors) and any pre-selection of predictors before model building. | p. 3 (Methods, Exposure assessment — RCII per Chen et al. [Ref. 12] and CTI per Ruan et al. [Ref. 11] were chosen a priori based on the AHA 2023 CKM framework [Ref. 7] and the cumulative RCII/CTI literature [Refs. 13–17, 18, 26, 50, 54–56]); p. 3 (Methods, Covariates and model structure — progressive Model 1–5 adjustment structure pre-specified with no data-driven predictor selection); p. 4 (Methods, Statistical analysis — 15 candidate biomarkers entered a priori into the machine-learning triangulation pipeline without data-driven screening). |
|  | **9b** *D;E* | Clearly define all predictors, including how and when they were measured (and any actions to blind assessment of predictors for the outcome and other predictors). | p. 3 (Methods, Exposure assessment — RCII = [residual cholesterol × hs-CRP] / 10, where residual cholesterol = total cholesterol − HDL-C − LDL-C; lnRCII = ln(RCII); CTI = 0.412 × ln(hs-CRP [mg/L]) + ln(TG [mg/dL] × FPG [mg/dL] / 2); fasting blood drawn at baseline Wave 1; assay methods: TG and HDL-C enzymatic, LDL-C direct enzymatic, FPG hexokinase, hs-CRP latex-enhanced immunonephelometry [limit of detection 0.1 mg/L]); p. 3 (Methods, Covariates and model structure — sociodemographic [age, sex, education, residence, marital status], lifestyle [smoking, drinking], anthropometric [BMI, waist circumference], clinical [hypertension, depressive symptoms (CESD-10 ≥10), eGFR by CKD-EPI equation, HbA1c, uric acid, multimorbidity count] covariates assessed at the same Wave 1 visit using standardised CHARLS protocols). |
|  | **9c** *D;E* | If predictor measurement requires subjective interpretation, describe the qualifications and demographic characteristics of the predictor assessors. | Not applicable — the primary exposures (lnRCII, CTI) and all biomarker covariates are objective laboratory measurements (enzymatic / direct enzymatic / hexokinase / latex-enhanced immunonephelometry assays at the Youanmen Center for Clinical Laboratory, Capital Medical University, Beijing); sociodemographic and clinical covariates are obtained through standardised structured questionnaire items, none requiring subjective interpretation by raters; see p. 3 (Methods, Exposure assessment and Covariates and model structure). |
| **Sample size** | **10** *D;E* | Explain how the study size was arrived at (separately for development and evaluation), and justify that the study size was sufficient to answer the research question. Include details of any sample size calculation. | p. 3 (Methods, Study design and population — analytical N = 3,224 derived from sequential exclusions applied to N = 25,617 Wave 1 participants, with 212 incident events). Sample-size justification: the events-per-variable (EPV) ≥10 heuristic (Peduzzi et al.) supports up to ~21 candidate predictors from 212 events; the primary Cox Model 4 includes 10 fixed-effect covariates plus the primary exposure, well within this bound. No formal a priori power calculation was performed; the analysis is a secondary analysis of an existing nationally representative cohort and was sized by the available CHARLS sample meeting eligibility criteria. Pre-specified extended-follow-up analyses through Waves 4 and 5 (event counts up to ~1,668) further support adequately powered corroboration. |
| **Missing data** | **11** *D;E* | Describe how missing data were handled. Provide reasons for omitting any data. | p. 3 (Methods, Study design and population — unified complete-case rule; n = 100 excluded for missing data on any Model 4 covariate or index, applied identically across the parallel CTI and lnRCII Cox models to ensure exact comparability; 61 participants with RCII = 0 [hs-CRP at the assay detection limit] subsumed within this exclusion); p. 4 (Methods, Statistical analysis — pre-specified sensitivity: multiple imputation by chained equations [MICE, m = 20, Rubin’s rules pooling] and survey-weighted Cox regression as comparisons to complete-case); Supplementary Tables S3–S4 (progressive Model 1–5 estimates and comparison of included versus excluded participants). |
| **Analytical methods** | **12a** *D* | Describe how the data were used (e.g., for development and evaluation of model performance) in the analysis, including whether the data were partitioned, considering any sample size requirements. | p. 4 (Methods, Statistical analysis — Cox proportional-hazards regression as the primary inferential model fitted on the whole primary cohort [N = 3,224; 212 events]). Machine-learning triangulation: 70%/30% stratified train–test split with 5-fold cross-validation on the training set for XGBoost and random-forest hyperparameter tuning; training cohort n ≈ 2,614, test cohort n ≈ 1,121 (test events = 75) within a broader ML cohort of N ≈ 3,735 that retained CKM Stage 4 cases dropped for the primary Cox analysis. Internal validation of the Cox-based nomogram: 1,000-bootstrap optimism correction (no separate held-out sample). |
|  | **12b** *D* | Depending on the type of model, describe how predictors were handled in the analyses (functional form, rescaling, transformation, or any standardisation). | p. 3 (Methods, Exposure assessment — natural-log transformation of RCII; per-1-SD scaling for continuous HR reporting; quartile categorisation [Q1–Q4, Q1 reference] for trend testing; CTI included with its native logarithmic functional form per Ruan et al. [Ref. 11]); p. 4 (Methods, Statistical analysis — restricted cubic splines with four knots at the 5th / 35th / 65th / 95th percentiles for non-linear dose–response evaluation [Figure 1]). |
|  | **12c** *D* | Specify the type of model, rationale, all model-building steps, including any hyperparameter tuning, and method for internal validation. | p. 4 (Methods, Statistical analysis — primary model: Cox proportional hazards [survival::coxph, Efron tie correction]; rationale: time-to-event outcome with right-censoring; progressive Models 1–5 adjustment [Model 4 primary; Model 5 over-adjustment check]; restricted cubic spline dose–response; Schoenfeld residual tests and log-minus-log plots for the proportional-hazards assumption). Nomogram development and internal validation: nomogram construction via R *rms* package; 1,000-bootstrap optimism-corrected Harrell C-index; 1,000-resample bootstrap calibration via *rms::calibrate()* per Austin et al. [Ref. 53]. Machine-learning triangulation: XGBoost and random-forest hyperparameters tuned by 5-fold cross-validation on the training set; logistic regression as a no-tuning baseline. |
|  | **12d** *D;E* | Describe if and how any heterogeneity in estimates of model parameter values and model performance was handled and quantified across clusters (e.g., hospitals, countries). See TRIPOD-Cluster for additional considerations. | p. 4 (Methods, Statistical analysis — Schoenfeld residual tests evaluated the proportional-hazards assumption; survey-weighted Cox regression with CHARLS sampling weights as a pre-specified sensitivity analysis accounting for the multistage stratified PPS design effects across 28 provinces and 150 counties [Ref. 34]); p. 6 (Results, Sensitivity analyses — Schoenfeld diagnostics indicated borderline proportional-hazards violation at the longest extended-follow-up windows; those estimates are interpreted as time-averaged effects). The TRIPOD-Cluster checklist was not separately applied because the focus is national-aggregate prediction rather than between-cluster heterogeneity. |
|  | **12e** *D;E* | Specify all measures and plots used (and their rationale) to evaluate model performance (e.g., discrimination, calibration, clinical utility) and, if relevant, to compare multiple models. | p. 4 (Methods, Statistical analysis — discrimination: 1,000-bootstrap optimism-corrected Harrell C-index [primary]; calibration: integrated calibration index [ICI] and maximum absolute calibration error [Emax] from 1,000-resample bootstrap *rms::calibrate()* per Austin et al. [Ref. 53]; clinical utility: decision-curve analysis per Vickers & Elkin [Ref. 31] with the survival-outcome extension [Ref. 51], computing net benefit across threshold probabilities 1–30% relative to treat-all and treat-none strategies, interpreted per Vickers, van Calster & Steyerberg [Ref. 32]); p. 4 (Methods, Statistical analysis — additional comparative measures: Fine–Gray competing-risk sub-distribution hazard ratios [Ref. 36], E-value sensitivity to unmeasured confounding [Ref. 37], NRI/IDI reclassification metrics); p. 6 (Results, Nomogram, calibration and decision-curve analysis — head-to-head comparison against hs-CRP alone [ΔC ≤0.003] reported in Supplementary Table S12). |
|  | **12f** *E* | Describe any model updating (e.g., recalibration) arising from the model evaluation, either overall or for particular sociodemographic groups or settings. | Not applicable (E-only item) — the present study is a single development cohort with internal optimism correction only; no separate external evaluation cohort was used and therefore no model-evaluation-driven recalibration was performed. Pre-specified sensitivity scenarios (Frailty Index ≥0.25 alternative outcome; baseline-robust restriction; population restriction and model-specification scenarios in Supplementary Table S2) functioned as internal robustness checks rather than recalibration. |
|  | **12g** *E* | For model evaluation, describe how the model predictions were calculated (e.g., formula, code, object, application programming interface). | Not applicable (E-only item) — the present study is a single development cohort with no separate external evaluation. Prediction-equation details for the developed model are reported under Item 22 (Cox-based nomogram coefficients/point allocation in Figure 3 and Table 4). |
| **Class imbalance** | **13** *D;E* | If class imbalance methods were used, state why and how this was done, and any subsequent methods to recalibrate the model or the model predictions. | No class-imbalance methods (SMOTE, under-/over-sampling, class-weighting) were applied. Rationale: the 4-year event rate of 6.6% (212/3,224) is consistent with prognostic-cohort norms and supports EPV-based inference without resampling. The machine-learning analysis (p. 4, Methods; p. 6, Results) is presented as complementary attribution rather than a deployable classifier, and Cox per-SD hazard ratios remain the primary inferential vehicle, so resampling was unnecessary and would have distorted absolute risk calibration. |
| **Fairness** | **14** *D;E* | Describe any approaches that were used to address model fairness and their rationale. | p. 4 (Methods, Statistical analysis — pre-specified subgroup analyses across eight strata: age, sex, BMI, education, hypertension, depression, glucose-metabolism status, and CKM stage); p. 6 (Results, Subgroup analyses — Figure 2 forest plots for lnRCII [Panel A] and CTI [Panel B] per 1-SD; subgroup interaction tests across the eight pre-specified strata for each of the two indices, none reaching significance [all P-interaction > 0.05], consistent with effect homogeneity across strata); p. 8 (Discussion, Strengths and limitations item 6 — explicit acknowledgement that external validation in non-Chinese cohorts is required to evaluate fairness across ethnic and healthcare-system strata). |
| **Model output** | **15** *D* | Specify the output of the prediction model (e.g., probabilities, classification). Provide details and rationale for any classification and how the thresholds were identified. | p. 6 (Results, Nomogram, calibration and decision-curve analysis — the Cox-based lnRCII nomogram outputs a linear-predictor risk score that translates to a 4-year cumulative incidence probability of new-onset Fried-phenotype frailty, not a categorical classification); clinically relevant decision thresholds were pre-specified at 5–10% on the basis of primary-care opportunistic-screening practice; decision-curve net benefit values across 1–30% thresholds are reported in Supplementary Table S9 and visualised in Figure 5; Table 4 and Figure 3 provide the nomogram point-allocation summary. |
| **Training vs evaluation** | **16** *D;E* | Identify any differences between the development and evaluation data in healthcare setting, eligibility criteria, outcome, and predictors. | Not applicable in the strict sense — single development cohort with no separate external evaluation set. Internal sensitivity-analysis scenarios deliberately varied eligibility (baseline-robust restriction; population-restriction scenarios in Supplementary Table S2) and outcome operationalisation (Frailty Index ≥0.25 as alternative to Fried phenotype in the extended cohort n = 4,604, Supplementary Tables S15–S17) to assess robustness; see p. 4 (Methods, Statistical analysis). |
| **Ethical approval** | **17** *D;E* | Name the institutional research board or ethics committee that approved the study and describe the participant-informed consent or the ethics committee waiver of informed consent. | p. 10 (Declarations, Ethics approval and consent to participate — the original CHARLS study was approved by the Biomedical Ethics Review Committee of Peking University, IRB00001052-11015; written informed consent was obtained from all participants; the present analysis of de-identified secondary data did not require additional ethical approval). |
| **OPEN SCIENCE** | | | |
| **Funding** | **18a** *D;E* | Give the source of funding and the role of the funders for the present study. | p. 10 (Declarations, Funding — National Natural Science Foundation of China [Grant No. 82411540241, to G.Y.]; Science and Technology Project of Xiamen Medical College [Grant No. K2023-09, to G.Y.]; 2024 Fujian Province Science and Technology Program Project [Grant No. 2024048, to G.Y.]; the funders had no role in study design, data collection, analysis, interpretation or manuscript preparation). |
| **Conflicts of interest** | **18b** *D;E* | Declare any conflicts of interest and financial disclosures for all authors. | p. 10 (Declarations, Competing interests — the authors declare no competing interests). |
| **Protocol** | **18c** *D;E* | Indicate where the study protocol can be accessed or state that a protocol was not prepared. | p. 10 (Declarations, Availability of data and materials — analytical methods, model specifications and parameter values are described in full in the Methods section and Supplementary Materials; a-priori hypotheses pre-specified in the Background final paragraph on p. 2; the parent CHARLS protocol is publicly available at https://charls.pku.edu.cn/en/ [Ref. 34]); pre-specified sensitivity-analysis framework enumerated on p. 4 (Methods, Statistical analysis). |
| **Registration** | **18d** *D;E* | Provide registration information for the study, including register name and registration number, or state that the study was not registered. | The present secondary analysis was not separately pre-registered. The a-priori hypotheses, analytical protocol, sensitivity-analysis framework, and outcome definitions are documented in the Methods section (pp. 3–4) and Background final paragraph (p. 2). |
| **Data sharing** | **18e** *D;E* | Provide details of the availability of the study data. | p. 10 (Declarations, Availability of data and materials — the datasets analysed are publicly available from the CHARLS repository at https://charls.pku.edu.cn/en/; access is governed by the parent CHARLS data-sharing agreement, with no additional permission required for de-identified secondary analyses). |
| **Code sharing** | **18f** *D;E* | Provide details of the availability of the analytical code. | p. 10 (Declarations, Availability of data and materials — the CHARLS data are publicly available and can be accessed from the CHARLS project website [https://charls.pku.edu.cn/en/]; the analytical code used in this study is available from the corresponding author upon reasonable request; all analyses were performed using R version 4.5.1, with no proprietary code or online pipeline used). Software environment: R 4.5.1 (p. 4); statistical implementation as described in the Methods uses the survival package (Cox proportional hazards via *survival::coxph*) and the rms package (Cox-based nomogram construction and 1,000-bootstrap optimism-corrected internal validation via *rms::calibrate()*); additional analyses described in the Methods include Fine–Gray competing-risk modelling, multiple imputation by chained equations (m = 20, Rubin’s rules), survey-weighted Cox regression with CHARLS sampling weights, E-value analysis, decision-curve analysis, and machine-learning triangulation with XGBoost, random forest, and logistic regression with TreeSHAP attribution. |
| **PATIENT & PUBLIC INVOLVEMENT** | | | |
| **Patient & Public Involvement** | **19** *D;E* | Provide details of any patient and public involvement during the design, conduct, reporting, interpretation, or dissemination of the study or state no involvement. | No formal patient or public involvement (PPI) was undertaken for the present secondary analysis of de-identified CHARLS data. The parent CHARLS study engages community advisory mechanisms at the village and county level during instrument design and field implementation; the present analytical research question (frailty risk stratification within the AHA 2023 CKM framework using a composite RCII against the Fried physical phenotype) emerged from the clinical literature [Refs. 7, 12, 18, 26, 54] rather than from direct PPI consultation. |
| **RESULTS** | | | |
| **Participants** | **20a** *D;E* | Describe the flow of participants through the study, including the number of participants with and without the outcome and, if applicable, a summary of the follow-up time. A diagram may be helpful. | p. 3 (Methods, Study design and population — sequential exclusions from N = 25,617 Wave 1 participants → primary analytical N = 3,224 [212 incident events / 3,012 censored]); Supplementary Figure S1 provides the STROBE participant-flow diagram with all intermediate stage totals; p. 5 (Results, Baseline characteristics — 12,845 person-years; mean follow-up 4.0 years). |
|  | **20b** *D;E* | Report the characteristics overall and, where applicable, for each data source or setting, including the key dates, key predictors (including demographics), treatments received, sample size, number of outcome events, follow-up time, and amount of missing data. A table may be helpful. Report any differences across key demographic groups. | p. 5 (Results, Baseline characteristics — narrative summary: mean age 62.39 ± 7.80 years; 51.6% female; 68.8% rural; 53.5% low education; mean lnRCII 0.79 ± 1.44; mean CTI 8.75 ± 0.80; higher-quartile participants showed greater BMI, higher prevalence of hypertension, pre-diabetes and type 2 diabetes, and lower eGFR, all P < 0.001); Table 1 (baseline characteristics stratified by lnRCII quartile, the primary exposure); Supplementary Table S1 (parallel baseline characteristics stratified by CTI quartile, the pre-specified comparator); Tables 2–3 (primary Cox HR results for lnRCII and CTI; Knol–VanderWeele joint-effects table); Table 4 (internal validation, decision-curve net benefit, and machine-learning triangulation summary). Missing data on Model 4 covariates: n = 100 excluded under the unified complete-case rule (Supplementary Table S4 compares included versus excluded participants). |
|  | **20c** *E* | For model evaluation, show a comparison with the development data of the distribution of important predictors (demographics, predictors, and outcome). | Not applicable (E-only item) — the present study is a single development cohort with no separate external evaluation. Pre-specified internal sensitivity scenarios (Fine–Gray competing-risk [Ref. 36; Supplementary Table S5]; E-value analysis for unmeasured confounding [Ref. 37; Supplementary Table S6]; multiple-imputation; survey-weighted Cox; extended-follow-up through Waves 4 and 5 [Supplementary Tables S15–S17]; population-restriction and model-specification scenarios [Supplementary Table S2]) compared distributions between the primary cohort and the corresponding sensitivity samples. |
| **Model development** | **21** *D;E* | Specify the number of participants and outcome events in each analysis (e.g., for model development, hyperparameter tuning, model evaluation). | Primary Cox model and nomogram: p. 5 (Results) — N = 3,224 with 212 events over 12,845 person-years. Machine-learning triangulation: p. 6 (Results, Machine-learning triangulation) — broader ML cohort N ≈ 3,735 (retaining CKM Stage 4 cases dropped for the primary Cox analysis); 70%/30% stratified split: training n ≈ 2,614 with ~165 events; test n ≈ 1,121 with 75 events. Sensitivity and extended-follow-up cohorts: p. 6 (Results, Sensitivity analyses) and Supplementary Tables S15–S17 — extended sensitivity cohort n = 4,604 (Frailty Index < 0.25 at baseline); Wave 4 and Wave 5 corroborative analyses with progressively larger event counts. |
| **Model specification** | **22** *D* | Provide details of the full prediction model (e.g., formula, code, object, application programming interface) to allow predictions in new individuals and to enable third-party evaluation and implementation, including any restrictions to access or re-use (e.g., freely available, proprietary). | Figure 3 (Cox-based lnRCII nomogram with point-allocation panel; apparent C-index 0.769, optimism-corrected 0.756); Supplementary Figure S2 (corresponding CTI nomogram); Table 4 (internal-validation summary including apparent and bootstrap-corrected C-index, ICI, Emax, and decision-curve net benefit at 5%, 10%, and 15% thresholds); p. 4 (Methods, Statistical analysis — nomogram construction with the R *rms* package); p. 10 (Declarations, Availability of data and materials — the analytical code used in this study is available from the corresponding author upon reasonable request). |
| **Model performance** | **23a** *D;E* | Report model performance estimates with confidence intervals, including for any key subgroups (e.g., sociodemographic). Consider plots to aid presentation. | p. 6 (Results, Nomogram, calibration and decision-curve analysis — lnRCII nomogram: apparent C-index 0.769, 1,000-bootstrap optimism-corrected C-index 0.756; apparent ICI 0.036, bootstrap-corrected 0.037; apparent Emax 0.068, bootstrap-corrected 0.082; decision-curve net benefit 0.030 at 5% threshold and 0.014 at 10% threshold). CTI comparator (p. 5): apparent C-index 0.767, optimism-corrected 0.755. p. 6 (Results, Machine-learning triangulation) — XGBoost test AUC 0.754 (95% CI 0.699–0.808); logistic regression test AUC 0.740 (95% CI 0.682–0.798); random forest test AUC 0.762 (95% CI 0.711–0.812); Brier scores 0.058–0.060 across the three classifiers. Figures 3–6 visualise these metrics; Table 4 tabulates them. |
|  | **23b** *D;E* | If examined, report results of any heterogeneity in model performance across clusters. See TRIPOD Cluster for additional details. | p. 6 (Results, Subgroup analyses — Figure 2 forest plots for lnRCII [Panel A] and CTI [Panel B] per 1-SD across eight pre-specified strata: age, sex, BMI, education, hypertension, depression, glucose-metabolism status, and CKM stage; subgroup interaction tests across the eight strata for each of the two indices, all P-interaction > 0.05); p. 6 (Results, Joint effects — formal additive-interaction analysis via Knol–VanderWeele cross-classification [Refs. 29, 30]: RERI = −0.70, 95% CI −2.13 to 0.61; AP = −0.42; S = 0.49). The TRIPOD-Cluster checklist was not separately applied because the focus is national-aggregate prediction rather than between-cluster heterogeneity. |
| **Model updating** | **24** *E* | Report the results from any model updating, including the updated model and subsequent performance. | Not applicable (E-only item) — the present study is a single development cohort with no separate external evaluation; no model updating was performed. See Item 12f. |
| **DISCUSSION** | | | |
| **Interpretation** | **25** *D;E* | Give an overall interpretation of the main results, including issues of fairness in the context of the objectives and previous studies. | p. 7 (Discussion, opening — lnRCII independently and dose-dependently predicted new-onset Fried-phenotype frailty over ~4 years, paralleling the established CTI; positioned as the first prospective Chinese-cohort evidence on the composite RCII against the Fried physical phenotype among baseline non-frail adults, advancing prior work in two specific directions: Hu et al. [Ref. 54] reported residual cholesterol alone — not the composite RCII — cross-sectionally in NHANES, and Zhang et al. [Ref. 26] examined RCII against the deficit-accumulation Frailty Index in CHARLS); pp. 7–8 (Comparison with previous studies — three concrete differences from prior cardiometabolic-index frailty studies enumerated: [1] Fried physical phenotype outcome aligned with EWGSOP-2 sarcopenia [Ref. 35] versus deficit-accumulation indices; [2] head-to-head benchmarking against the validated CTI with explicit modelling of the shared hs-CRP component and collinearity; [3] deployable internally validated nomogram with decision-curve evaluation); p. 8 (Clinical implications — fairness across sociodemographic strata supported by uniform null subgroup interactions, with explicit need for external validation in non-Chinese cohorts). |
| **Limitations** | **26** *D;E* | Discuss any limitations of the study (such as a non-representative sample, sample size, overfitting, missing data) and their effects on any biases, statistical uncertainty, and generalizability. | p. 8 (Discussion, Strengths and limitations — eight numbered limitations: [1] lnRCII and CTI share the hs-CRP component and are strongly correlated (r = 0.84), presented as parallel single-exposure analyses with explicit collinearity sensitivity, with modest incremental discrimination over hs-CRP alone indicating that their value is interpretive and pragmatic rather than purely discriminatory; [2] E-values 1.83–3.33 indicate modest-to-moderate robustness to unmeasured confounding, and residual confounding cannot be excluded; [3] 4-year primary window with 6.6% event rate limits power for fine-grained interaction testing, with extended-follow-up analyses corroborating the findings but showing borderline proportional-hazards violation at the longest windows; [4] the Fried phenotype relies partly on self-reported components (potential non-differential misclassification) and CHARLS 2011 did not collect granular data on lipid-lowering or anti-inflammatory therapies; [5] the machine-learning analysis is a complementary, exploratory attribution exercise with overlapping classifier confidence intervals; SHAP and impurity rankings for the strongly correlated composite indices are unstable across seeds and tuning and are not interpreted as differential importance [Ref. 33]; [6] generalisability to non-Chinese populations requires external validation; [7] the nomogram achieves moderate discrimination [optimism-corrected C-index 0.756] reflecting a deliberately parsimonious model relying solely on routine fasting biomarkers and standard demographic/clinical variables, with positive decision-curve net benefit at 5–10% threshold probabilities indicating preserved clinical usefulness consistent with the principle that discrimination alone does not determine net benefit [Refs. 31, 32]; [8] in the pre-specified extended-follow-up joint models at Waves 4 and 5 (Supplementary Table S16, Panel A), the per-SD lnRCII signal attenuated while the CTI signal concentrated and remained significant — interpreted as further manifestation of the shared hs-CRP-driven substrate, reinforcing the parallel single-exposure analytic recommendation). |
| **USABILITY OF THE MODEL IN THE CONTEXT OF CURRENT CARE** | | | |
| **Usability** | **27a** *D* | Describe how poor quality or unavailable input data (e.g., predictor values) should be assessed and handled when implementing the prediction model. | Development-stage missing-data handling: p. 3 (Methods, Study design and population) and p. 4 (Methods, Statistical analysis) — unified complete-case rule (n = 100 excluded across all primary Cox models), with MICE (m = 20 imputations, Rubin’s rules) and survey-weighted Cox as pre-specified sensitivity scenarios. Deployment-stage input-quality considerations: p. 3 (Methods, Exposure assessment) — all five biomarker inputs (TG, FPG, HDL-C, LDL-C, hs-CRP) are objective fasting laboratory measurements drawn under standardised CHARLS protocols at the Youanmen Center for Clinical Laboratory, substantially mitigating input-quality risk in practice; p. 8 (Discussion, Clinical implications) — inputs are routine fasting lipid, glucose and hs-CRP measurements already captured by China’s annual cardiometabolic surveillance for adults aged ≥45 years. |
|  | **27b** *D* | Specify whether users will be required to interact in the handling of the input data or use of the model, and what level of expertise is required of users. | p. 8 (Discussion, Clinical implications — the lnRCII nomogram is intended for use by primary-care physicians; user interaction is limited to transcribing five standard fasting laboratory values [TG, FPG, HDL-C, LDL-C, hs-CRP] plus standard demographic and clinical variables routinely captured during a primary-care visit; computation is performed via point-allocation summation and total-points-to-probability axis lookup on the Figure 3 nomogram and is computable in minutes during a routine outpatient visit; no specialist statistical or machine-learning expertise is required of end users). |
|  | **27c** *D;E* | Discuss any next steps for future research, with a specific view to applicability and generalizability of the model. | p. 8 (Discussion, Clinical implications and Strengths and limitations) and p. 8 (Conclusions) — future directions: [1] external validation in non-CHARLS Chinese cohorts (e.g., the China Kadoorie Biobank) and in non-Chinese cohorts (ELSA, HRS) to evaluate generalisability across ethnic and healthcare-system strata; [2] prospective interventional studies to determine whether targeted modulation of lnRCII through lifestyle intervention or pharmacotherapy reduces incident frailty; [3] harmonisation of single-composite use of lnRCII (rather than dual entry with CTI) across CHARLS-based analyses, given the shared hs-CRP substrate. |
| **OTHER INFORMATION** | | | |
| **Supplementary information** | **—** *D;E* | Provide supplementary information or note its availability. | Supplementary File 1 (STROBE checklist); Supplementary File 2 (this TRIPOD+AI 2024 checklist); Supplementary Tables S1–S17 (population-restriction and model-specification scenarios; progressive Model 1–5 estimates; included-vs-excluded comparison; Fine–Gray competing-risk; E-value; NRI/IDI reclassification; hs-CRP head-to-head; decision-curve net benefit; ML classifier comparison and per-feature attributions; joint-model coefficients; fasting-status robustness; Frailty-Index ≥0.25 alternative outcome with multi-window extended-follow-up); Supplementary Figures S1–S4 (STROBE flow; CTI nomogram; random-forest impurity importance; CTI calibration plot). |

***Notes.***

*Item-scope labels follow the TRIPOD+AI 2024 official Checklist (Collins GS et al., BMJ 2024;385:e078378, Supplementary Table 2, version 11 January 2024):* ***D*** *= item relevant only to development of a prediction model;* ***E*** *= item relating solely to evaluation of a prediction model;* ***D;E*** *= item applicable to both development and evaluation. The present study is development-only; items labelled “D;E” therefore address the D facet only, and four E-only items (Items 12f, 12g, 20c, 24) are marked Not applicable with explicit explanations. Item 6c is Not applicable in the interventional sense because this is an observational cohort with no protocol-defined intervention; baseline lifestyle and chronic-condition covariates are reported under Item 9b. Items 8b and 9c are Not applicable because all outcome and predictor measurements in CHARLS are obtained through standardised structured questionnaires or objective laboratory assays, with no requirement for subjective rater interpretation. Item 13 is reported as not used, with rationale (event rate 6.6% supports EPV-based inference without resampling). Item 16 is Not applicable in the strict external-evaluation sense because there is no separate external evaluation cohort; internal sensitivity scenarios deliberately vary eligibility and outcome operationalisation. Item 27a addresses both development-stage missing-data handling (complete-case + MICE m = 20 + survey-weighted Cox) and deployment-stage input-quality considerations (objective laboratory inputs drawn under standardised CHARLS protocols).*

***All page numbers refer to the current main manuscript submitted to Lipids in Health and Disease. Reference numbers in square brackets ([Ref. N]) refer to the numbered reference list in that manuscript (56 references total).***

*The TRIPOD+AI 2024 statement (Collins GS et al., BMJ 2024;385:e078378) supersedes the TRIPOD 2015 statement for prediction-model reporting. The full official Checklist (Supplementary Table 2, BMJ 2024) and Expanded Checklist with Explanation & Elaboration Light (Supplementary Table 1, BMJ 2024) are available at https://www.tripod-statement.org/ and as BMJ supplementary materials linked from the article DOI.*
