# Supplementary material
Source: Research Square preprint supplement (doi:10.21203/rs.3.rs-9776416/v1)
Supplement: Supplementary file 4 [file 85661905d6d8e48fb3ed9ec5.pdf]

## Random-forest variable importance — ML cohort (n = 3,735)

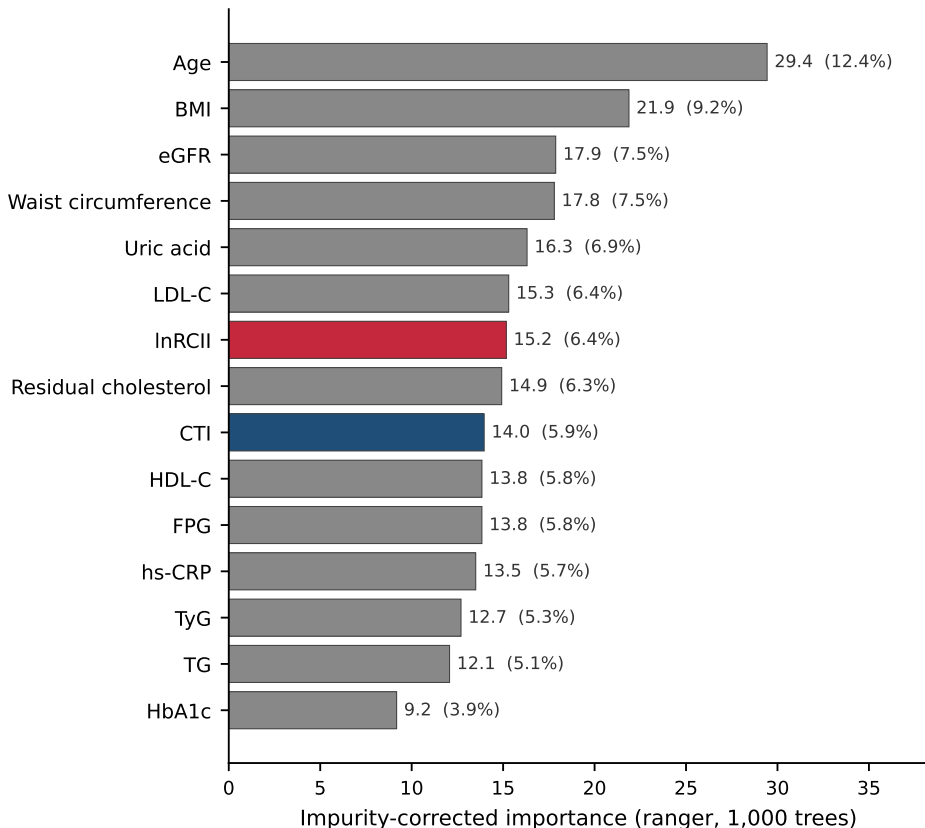

Note: SHAP (Figure 6 Panel A) and RF impurity ranks diverge for the strongly correlated CTI/InRCII composites and are not interpreted as differential importance (Rashomon effect; see manuscript Table S10).
