# Supplementary material
Source: Research Square preprint supplement (doi:10.21203/rs.3.rs-9776416/v1)

# CTI nomogram (comparator)

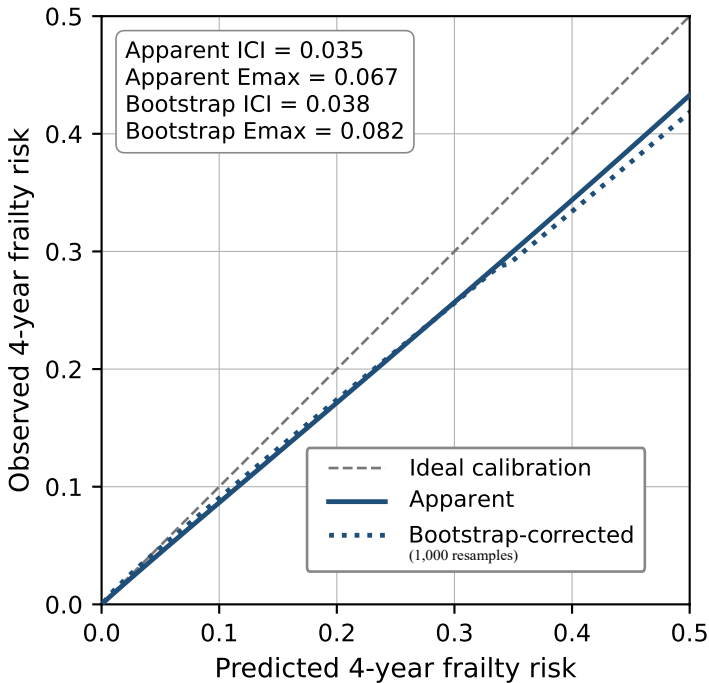

Supplement: Supplementary file 5 [file b6c15e80c0618964b610eebb.pdf]

# Model 4 + CTI (comparator)

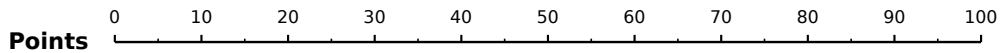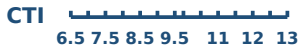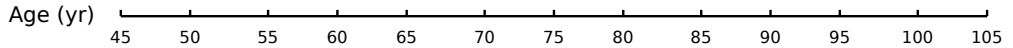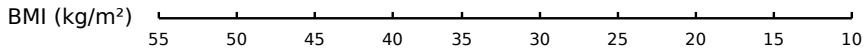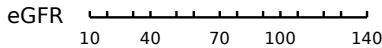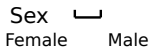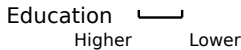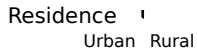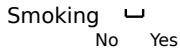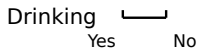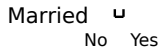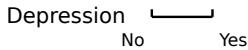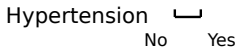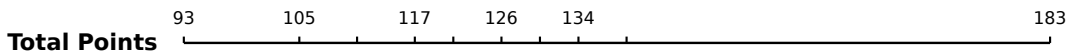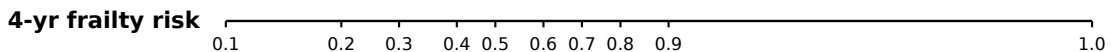

Apparent C-index = 0.767 | 1,000-bootstrap optimism-corrected C-index = 0.755

Supplement: Supplementary file 6 [file ff79faaa47f2a72c74adc70e.pdf]
